# Supplementary material
Source: PubMed Central journal article supplement (PMC4788992)
Supplement: NIHMS716602-supplement-Supp_FigureS1.pdf [file NIHMS716602-supplement-Supp_FigureS1.pdf]

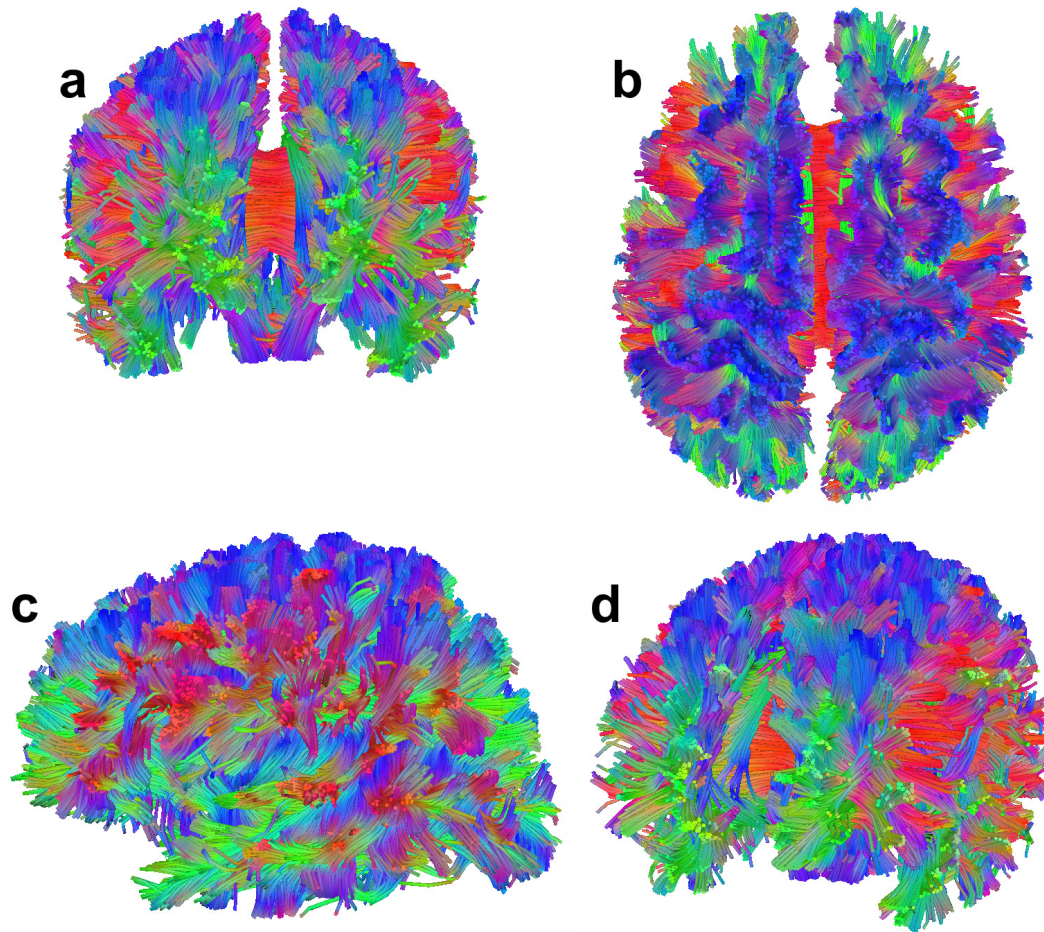

Figure S1: Tractography results of a Radial DSI (4 shells, 59 radial lines) reconstruction of a healthy human brain volunteer acquired using a twice refocused spin echo sequence as seen frontally (a), superiorly (b), laterally (c) and obliquely (d).
